# 1 mRNA Degradation Rates Are Coupled to Metabolic Status in Mycobacteria

2

3 Diego A. Vargas-Blanco<sup>a</sup>, Ying Zhou<sup>a</sup>, Luis Gutierrez Zamalloa<sup>a</sup>, Tim Antonelli<sup>b</sup>, Scarlet S.

4 Shell<sup>a, c\*</sup>

5

6 <sup>a</sup> Department of Biology and Biotechnology, Worcester Polytechnic Institute, Worcester,  
7 Massachusetts, USA

8 <sup>b</sup> Department of Mathematics, Worcester State University, Worcester, Massachusetts, USA

9 <sup>c</sup> Program in Bioinformatics and Computational Biology, Worcester Polytechnic Institute,  
10 Worcester, Massachusetts, USA

11

12 \* Address correspondence to Scarlet S. Shell, [sshell@wpi.edu](mailto:sshell@wpi.edu).

13

14 **Keywords: ATP, carbon starvation, hypoxia, mRNA degradation, mRNA stability,**

15 ***Mycobacterium smegmatis*, stress response, tuberculosis.**

16

## 17 ABSTRACT

18 The success of *Mycobacterium tuberculosis* (Mtb) as a human pathogen is due in part to its  
19 ability to survive stress conditions, such as hypoxia or nutrient deprivation, by entering non-  
20 growing states. In these low-metabolic states, Mtb can tolerate antibiotics and develop

21 genetically encoded antibiotic resistance, making its metabolic adaptation to stress crucial for  
22 survival. Numerous bacteria, including Mtb, have been shown to reduce their rates of mRNA  
23 degradation under growth limitation and stress. While the existence of this response appears to  
24 be conserved across species, the underlying bacterial mRNA stabilization mechanisms remains  
25 unknown. To better understand the biology of non-growing mycobacteria, we sought to identify  
26 the mechanisms by which mRNA stabilization occurs using the non-pathogenic model  
27 *Mycobacterium smegmatis*. We found that mRNA half-life was responsive to energy stress, with  
28 carbon starvation and hypoxia causing global mRNA stabilization. This global mRNA  
29 stabilization was rapidly reversed when hypoxia-adapted cultures were re-exposed to oxygen,  
30 even in the absence of new transcription. The stringent response and RNase protein levels did not  
31 explain mRNA stabilization, nor did transcript abundance. This led us to hypothesize that  
32 metabolic changes during growth cessation impact the activity of degradation proteins,  
33 increasing mRNA stability. Indeed, bedaquiline and isoniazid, two drugs with opposing effects  
34 on cellular energy status, had opposite effects on mRNA half-lives in growth-arrested cells.  
35 Taken together, our results indicate that mRNA stability in mycobacteria is not directly regulated  
36 by growth status, but rather seems to be dependent on the status of energy metabolism.

## 37 **IMPORTANCE**

38 The logistics of treating tuberculosis are difficult, requiring multiple drugs for at least six  
39 months. Mtb is able to survive within the human host in part by entering non-growing states in  
40 which it is metabolically less active, thus rendering it less susceptible to antibiotics. Basic  
41 knowledge on how Mtb survives during these low-metabolic states is incomplete, and we  
42 postulate that optimized energy resource management –such as transcriptome stabilization—is  
43 important for survival. Here we report that mRNA stabilization (increased mRNA half-lives) is a

44 common feature of mycobacteria under stress (e.g. hypoxia and nutrient deprivation) but is not  
45 dependent on the mechanisms that have been most often postulated in the literature. Finally, we  
46 found that mRNA stability and growth status can be decoupled by a drug that causes growth  
47 arrest but increases metabolic activity, indicating that mRNA stability responds to metabolic  
48 status rather than to growth rate changes per se. Our findings suggest a need to re-orient the  
49 study of global mRNA stabilization to identify novel mechanisms that are presumably  
50 responsible.

51

---

## 52 INTRODUCTION

53 Most bacteria periodically face environmental conditions that are unfavorable for growth. To  
54 overcome such challenges, bacteria must adapt both their gene expression profiles and their  
55 energy usage. Regulation of mRNA turnover can contribute to both of these. However, the  
56 mechanisms by which mRNA turnover is carried out and regulated remain poorly understood,  
57 particularly in mycobacteria.

58 During infection, the human pathogen *Mycobacterium tuberculosis* (Mtb) faces not only the  
59 immune response and antibiotics, but also multiple non-optimal microenvironments, such as  
60 hypoxia and nutrient starvation within the granuloma (1, 2). Regulation of mRNA turnover  
61 appears to contribute to adaptation to such conditions. A global study of mRNA decay in Mtb  
62 showed a dramatic increase in transcriptome stability—measured as increased mRNA half-  
63 lives— in response to hypoxia, when compared to log phase growth in oxygen-rich conditions  
64 (3). This suggests that mRNA stabilization is important for energy conservation in the energy-  
65 limited environments that Mtb encounters during infection. Similar responses have been shown

66 for other bacteria under stress conditions that slow or halt growth, including carbon deprivation,  
67 stationary phase, and temperature shock (4-13). However, the mechanisms responsible for global  
68 regulation of mRNA stability in prokaryotes have yet to be elucidated.

69 In better studied bacteria such as *E. coli* and *B. subtilis*, the major ribonucleases (RNases)  
70 involved in mRNA processing and decay are RNase E and RNase Y, respectively. A  
71 conventional model for RNA decay in *E. coli* start with an endonucleolytic cleavage event  
72 usually carried by RNase E in AU-rich regions, particularly in mRNA substrates that possess a 5'  
73 monophosphate (14-16). The resulting 5' monophosphorylated fragments are rapidly cleaved by  
74 RNase E, resulting in shorter fragments that can be fully degraded by exonucleases such as  
75 PNPase, RNase II, and RNase R (17, 18). mRNA degradation seems to be coordinated by  
76 formation of a complex known as the degradosome. In *E. coli*, RNase E serves as the scaffold for  
77 this multiprotein complex that comprises RNA helicases, the glycolytic enzyme enolase, and  
78 PNPase (19-23). Other organisms that encode RNase E form similar degradosomes (24, 25). In  
79 organisms where RNase E is not present, RNase Y and/or RNase J seem to assume the scaffold  
80 function (26-28). Mycobacteria encode RNase E, but efforts to define the mycobacterial  
81 degradosome have produced inconsistent results (29, 30). It is unclear if degradosome  
82 reorganization or dissolution contribute to the global regulation of mRNA degradation under  
83 stress conditions in any bacteria. Interestingly, the importance of degradosome formation in *E.*  
84 *coli* varies depending on the carbon sources provided, suggesting specific links between RNase E  
85 degradosomes and metabolic capabilities (31). Furthermore, the chaperones DnaK and CsdA can  
86 become degradosome components in *E. coli* under certain stresses (20, 32, 33).

87 Global transcript stabilization in stressed bacteria could plausibly result from reduced RNase  
88 abundance, reduced RNase activity, and/or reduced accessibility of transcripts to degradation

89 proteins. In *E. coli* it has been shown that multiple stressors can upregulate RNase R, possibly as  
90 a way to overcome ribosome misassembly (34, 35), and that RNase III levels decrease under  
91 cold-shock and stationary phase (36). Surprisingly, protein levels for most putative RNA  
92 degradation proteins in *M. tuberculosis* remain unaltered under hypoxic conditions (37), which  
93 suggests that mRNA degradation is not necessarily regulated at the level of RNase abundance in  
94 mycobacteria. However, there is evidence that RNase activity may be regulated. For example,  
95 proteins such as RraA and RraB can alter the function of the RNase E-based degradosome in *E.*  
96 *coli* (38). Translating ribosomes can mask mRNA cleavage sites, and, indeed, transcription-  
97 translation dissociation experiments showed that ribosome-free mRNAs were highly unstable  
98 (39). Furthermore, in some actinomycetes PNPase might be regulated by the stringent response  
99 alarmone guanosine tetraphosphate (ppGpp) (40, 41). In Gram-negative bacteria ppGpp is  
100 usually synthesized by RelA, which is activated in the presence of uncharged tRNAs, or by the  
101 ppGpp synthase/hydrolase SpoT during fatty acid starvation (42). In Gram-positive bacteria,  
102 ppGpp is commonly synthesized by a dual RelA/SpoT homolog (43-45). Diverse bacteria adapt  
103 to stress using ppGpp in different pathways, which generally result in halting the synthesis of  
104 stable RNA (tRNAs and rRNAs), while upregulating stress-associated genes and downregulating  
105 those associated with cell growth (45-50). Recent reports in two actinomycetes—*Streptomyces*  
106 *coelicolor* and *Nonomuraea*—showed that, at physiological levels, ppGpp inhibited the  
107 enzymatic activity of PNPase (40, 41), suggesting that the stringent response could directly  
108 stabilize mRNA as part of a broader response to energy starvation.

109 Another explanation for stress-induced transcript stabilization could be that reduced transcript  
110 abundance directly leads to increased transcript stability. mRNA abundance and half-life were  
111 reported to be inversely correlated in multiple bacteria including *Mtb* (3, 8, 51, 52), and mRNA

112 abundance is lower on a per-cell basis for most transcripts in non-growing bacteria. In  
113 *Caulobacter crescentus*, subcellular localization of mRNA degradation proteins may play a role  
114 in global mRNA stability (53, 54). Nevertheless, the causal relationships between translation,  
115 mRNA abundance, RNase expression, and mRNA stability in non-growing bacteria remain  
116 largely untested.

117 Given the importance of adaptation to energy starvation for mycobacteria, we sought to  
118 investigate the mechanisms by which mRNA stability is globally regulated. Here we show that  
119 the global mRNA stabilization response occurs also in *Mycobacterium smegmatis*—a non-  
120 pathogenic model commonly used to study the basic biology of mycobacteria —under hypoxia  
121 and carbon starvation. We found that hypoxia-induced mRNA stability is rapidly reversible, with  
122 re-aeration causing immediate mRNA destabilization even in the absence of protein synthesis.

123 As expected, we found that transcript levels from hypoxic cells are lower on a per-cell basis  
124 compared to those from aerated cultures. However, our data are inconsistent with a model in  
125 which mRNA abundance dictates degradation rate as has been shown for log-phase *E. coli* (51)  
126 and *Lactococcus lactis* (52). Instead, our findings support the idea that mRNA stability is rapidly  
127 tuned in response to alterations in energy metabolism. This effect does not require the stringent  
128 response or changes in abundance of RNA degradation proteins, and it can be decoupled from  
129 growth status.

---

130

131

132 **RESULTS**

133 **mRNA is stabilized as a response to carbon starvation and hypoxic stress in *Mycobacterium***  
134 ***smegmatis***

135 The mRNA pools of *E. coli* and other well-studied bacteria were reported to be globally  
136 stabilized during conditions of stress, resulting in increased mRNA half-lives (3-13). In 2013,  
137 Rustad *et al.* reported a similar phenomenon in Mtb under hypoxia and during cold shock (3).  
138 We sought to establish *M. smegmatis* as a model for study of the mechanistic basis of mRNA  
139 stabilization in mycobacteria under stress conditions. We therefore subjected *M. smegmatis* to  
140 hypoxic and carbon starvation stresses, and measured mRNA half-lives for a subset of genes by  
141 blocking transcription with rifampicin (RIF) and measuring mRNA abundance at multiple time  
142 points using quantitative PCR (qPCR). Indeed, we observed that all of the analyzed transcripts  
143 had increased half-lives under hypoxia when compared to log phase normoxic cultures and,  
144 similarly, transcripts were more stable in carbon starvation than in rich media (Fig. 1A and 1B).  
145 Thus, *M. smegmatis* appears to be a suitable model organism for investigating the mechanisms of  
146 stress-induced mRNA stabilization in mycobacteria. We used a variation of the Wayne model  
147 (55) to produce a gradual transition from aerated growth to hypoxia-induced growth arrest by  
148 sealing cultures in vials with defined headspace ratios and allowing them to slowly deplete the  
149 available oxygen (Fig. 1C). We noted that transcripts became progressively more stable as  
150 oxygen levels dropped and growth ceased; 40 hours after sealing the vials, mRNA half-lives  
151 were too long to reliably measure by our methodology. We sought to focus our studies on the  
152 mechanisms that underlie the initial mRNA stabilization process during the transition into  
153 hypoxia-induced growth arrest. We therefore conducted subsequent experiments 18 hours after

154 sealing the vials, when growth had nearly ceased and transcripts were 9-fold to 25-fold more  
155 stable than during log phase growth. We hereafter refer to this condition as 18 h hypoxia.

### 156 **ppGpp does not contribute to mRNA stabilization in hypoxia or carbon starvation**

157 Given recent reports that ppGpp could directly inhibit the enzymatic activity of PNPase (40, 41),  
158 we wondered whether mRNA stabilization as observed in carbon starvation and hypoxia is  
159 regulated by ppGpp in mycobacteria. We obtained a double mutant strain of *M. smegmatis* (56)  
160 that lacks both genes implicated in the production of ppGpp ( $\Delta rel \Delta sas2$ ), and compared the  
161 mRNA half-lives of a subset of genes to those of wild type mc<sup>2</sup>155 under hypoxia, log phase  
162 normoxia, and carbon starvation conditions. The  $\Delta rel \Delta sas2$  strain had a modest growth defect  
163 during adaptation to hypoxia and carbon starvation (Fig. 2A and 2C), as predicted (57).  
164 However, we found no significant decrease in mRNA stabilization in the mutant strain (Fig. 2B  
165 and 2D), indicating that the mRNA stabilization we observed under hypoxia and carbon  
166 starvation is independent from the stringent response. Interestingly, the mutant strain displayed  
167 increased mRNA stabilization for a few transcripts under carbon starvation conditions, which  
168 could be an indirect consequence of altered transcription rates (see discussion).

### 169 **Hypoxia-induced mRNA stability is reversible and independent of mRNA abundance**

170 We wondered if the observed stress-induced transcript stabilization could be easily reversed by  
171 restoration of a favorable growth environment. To test this, we prepared 18 h hypoxia cultures,  
172 then opened the vials and agitated them for 2 min to re-expose the bacteria to oxygen before  
173 blocking transcription with RIF and sampling thereafter (Fig. 3A, top panel). We found that, for  
174 all transcripts tested, half-lives were significantly decreased compared to those observed under  
175 hypoxia and similar to those observed in log phase normoxia (Fig. 3B). While the mechanisms of



176 stress-induced mRNA stabilization are largely unknown, multiple studies have reported inverse  
177 correlations between mRNA abundance and half-life in bacteria (3, 8, 51, 52). mRNA abundance  
178 is decreased for most transcripts tested in hypoxia-adapted *M. smegmatis*. We therefore  
179 considered the possibility that the dramatic increase in mRNA degradation upon re-exposure to  
180 oxygen was triggered by a rapid burst of transcription. Indeed, we found increased expression  
181 levels for three of five genes tested after two minutes of re-aeration, showing that transcription is  
182 rapidly induced upon return to a favorable environment (Fig. 3C). To test the idea that mRNA is  
183 destabilized by re-aeration as a consequence of a transcriptional burst and/or increased mRNA  
184 abundance, we modified our re-aeration experiment by blocking transcription with RIF one  
185 minute prior to re-exposure to oxygen (Fig. 3A, bottom panel). Surprisingly, every transcript  
186 tested was destabilized by the presence of oxygen despite the absence of new transcription. For  
187 most transcripts, the re-aeration half-lives were indistinguishable regardless of whether RIF was  
188 added prior to opening the vials or two minutes after (Fig. 3B). Our results therefore do not  
189 support the idea that changes in mRNA abundance alone can explain the mRNA stabilization and  
190 destabilization observed in response to changes in energy status.

191 We wanted to further explore if mRNA abundance alone could influence transcript degradation.  
192 Hence, we obtained a *M. smegmatis* strain encoding *dCas9* and a non-specific sgRNA under  
193 control of an ATc-inducible promoter (58) and compared the *dCas9* transcript stability under  
194 hypoxia and log phase normoxic conditions after ATc induction or at basal levels of expression.  
195 Our results showed that despite a 34-fold transcript upregulation following ATc induction, the  
196 half-life of *dCas9* mRNA was not significantly different from the no-drug control under log  
197 phase normoxia. Under hypoxia, its 28-fold upregulation was associated with a modest increase  
198 in *dCas9* mRNA half-life when compared to the no-drug control (Fig. 3D and 3E). Taken

199 together, our results show that increased mRNA abundance does not necessarily result in a faster  
200 decay rate.

### 201 **mRNA stability is modulated independently of RNase protein levels**

202 Another potential explanation for increased mRNA degradation after re-aeration is the up-  
203 regulation of mRNA degradation proteins such as RNase E. To assess the role of a sudden burst  
204 in protein levels we used two approaches. First, we constructed *M. smegmatis* strains encoding  
205 FLAG-tagged RNase E, cMyc-tagged PNPase, or cMyc-tagged predicted RNA helicase  
206 msmeg\_1930. PNPase is an essential exoribonuclease. We determined protein levels by western  
207 blotting during log phase, in 18 h hypoxia, and after 18 h hypoxia followed by 2 min re-aeration.  
208 As shown in Fig. 4A, levels of all three of these predicted RNA degradation proteins remained  
209 unchanged in the three conditions.

210 Because we do not know all of the proteins that contribute to mRNA degradation in  
211 mycobacteria, our second approach was to test the global importance of translation in re-  
212 aeration-induced mRNA destabilization. We blocked translation with chloramphenicol (CAM) in  
213 18 h hypoxia cultures and then added RIF. Samples were collected for cultures that remained  
214 under hypoxia as well as those that were re-exposed to oxygen for 2 min (Fig. 4B). Our results  
215 showed that there is destabilization of mRNA after re-aeration even in the absence of protein  
216 synthesis (Fig. 4C), though not to the extent we observed in Fig. 3B. These results suggest that  
217 re-aeration-induced destabilization does not require synthesis of new RNA degradation proteins.  
218 The mRNA stabilization induced by CAM itself is likely related to its mechanism of action.  
219 CAM inhibits elongation by blocking the 50S ribosomal subunit from binding tRNAs,  
220 preventing peptidyl transferase activity (59-61) and causing ribosomal stalling (62). Thus,  
221 consistent with our data, others have reported global stabilization of mRNA pools when

222 elongation inhibitors, but not initiation inhibitors, are used for example in log phase cultures of  
223 *E. coli* (62) or in yeast (63). We hypothesize that stalled ribosomes may increase mRNA stability  
224 by masking RNase cleavage sites. However, we observe mRNA destabilization in response to re-  
225 aeration despite this effect (Fig. 4C). Taken together, our data suggest that tuning of protein  
226 levels is not the primary explanation for mRNA stabilization during early adaptation to hypoxia.

### 227 **mRNA stability is modulated in response to changes in metabolic status**

228 The rapidity of mRNA destabilization in response to re-aeration suggested that mRNA  
229 degradation is tightly regulated in response to changes in energy metabolism. We tested this  
230 hypothesis by treating log phase cultures of *M. smegmatis* with 5  $\mu\text{g}\cdot\text{mL}^{-1}$  bedaquiline (BDQ), a  
231 potent inhibitor of the ATP synthase F0F1 (64). We used minimal media that contained acetate  
232 as the only carbon source (MMA) in order to make the respiratory chain the sole source of ATP  
233 synthesis. After 30 min exposure, intracellular ATP levels were reduced by more than 90% in  
234 BDQ-treated cells, when compared to cells treated with the drug vehicle (DMSO), without  
235 affecting cell viability (Fig. 5A and 5B). We then measured half-lives for a set of transcripts  
236 under these conditions. mRNA half-lives were dramatically increased in BDQ-treated cells for  
237 most of the genes we tested (Fig. 5C), indicating that mRNA degradation rates are rapidly altered  
238 in response to changes in energy metabolism status.

239 We then wondered if we could increase mRNA degradation rates by increasing intracellular ATP  
240 levels. To test this, we treated *M. smegmatis* cultures with isoniazid (INH) a pro-drug that  
241 interferes with the synthesis of mycolic acids, but that also leads to an accumulation of  
242 intracellular ATP due to increased oxidative phosphorylation (65). We exposed *M. smegmatis* to  
243 500  $\mu\text{g}\cdot\text{mL}^{-1}$  INH for 6.5 hours to confirm that we had achieved bacteriostasis (the *M. smegmatis*  
244 doubling time in MMA media is approximately six hours). As shown in Fig. 5D, INH caused a

245 dramatic increase in intracellular ATP after 6.5 h without affecting cell viability (Fig. 5E).  
246 Remarkably, mRNA half-lives were significantly decreased in response to INH (Fig. 5F). To our  
247 knowledge, this is the first report of bacterial mRNA being destabilized rather than stabilized in  
248 response to a growth-impairing stressor. Our results indicate that mRNA stability is regulated not  
249 in response to growth status per se, but rather to energy metabolism. Although we interpreted  
250 ATP levels as a reflection of metabolic status in our INH and BDQ assays, the coupling between  
251 mRNA degradation and metabolic status does not appear to be mediated by ATP directly. We  
252 measured ATP levels in *M. smegmatis* cultures during the transition to hypoxia-induced growth  
253 arrest, and found that although ATP levels ultimately decrease in hypoxia as has been reported  
254 elsewhere (66, 67), mRNA stabilization precedes the drop in ATP levels (Fig. 5G).

255

---

## 256 **DISCUSSION**

257 Many stressors cause bacteria to slow or stop growth, and this is usually associated with  
258 increased mRNA stability (3-9, 11-13). Many of these same stressors reduce energy availability  
259 (66, 67), requiring reductions in energy consumption and optimization of resource allocation. We  
260 speculate that the decreased mRNA turnover that accompanies such conditions may be an energy  
261 conservation mechanism. For *Mtb*, hypoxia can lead to generation of bacterial subpopulations  
262 with varying degrees of antibiotic tolerance (68-70), facilitating bacterial survival and the  
263 acquisition of drug resistance-conferring mutations. Understanding the mechanisms that support  
264 the transitions into non-growing states, and subsequent survival in these states, is therefore of  
265 great importance.

266 The transcriptome of Mtb has been previously shown to be stabilized under cold shock and  
267 hypoxia (3). Here, we found that *M. smegmatis* also dramatically stabilized its mRNA in  
268 response to carbon starvation and oxygen depletion. For the first time, to our knowledge, we  
269 tested the speed at which this stabilization is reversed in mycobacteria upon restoration of energy  
270 availability. Remarkably, mRNAs are rapidly destabilized within minutes of re-aeration of  
271 hypoxic cultures, suggesting that tuning of mRNA degradation rates is an early step in the  
272 response to changing energy environments.

273 The most straightforward explanation for stress-induced mRNA stabilization would seem to be  
274 downregulation of the mRNA degradation machinery. Indeed, under hypoxic conditions, RNase  
275 E is downregulated at the transcript level, and abundance of cleaved RNAs is notably reduced  
276 (71). However, we found that protein levels were unchanged for three proteins predicted to be  
277 core components of the mRNA degradation machinery. This is largely consistent with what was  
278 reported for Mtb in a quantitative proteomics study (37), although in that case there was an  
279 apparent reduction in levels of a predicted RNA helicase. To address this question in a more  
280 agnostic fashion, we tested the importance of translation for transcript destabilization upon re-  
281 exposure of hypoxic cultures to oxygen. However, re-aeration triggered increased transcript  
282 degradation even in the absence of new protein synthesis. Regulation of degradation protein  
283 levels therefore does not appear to contribute to mRNA stabilization during the initial response  
284 to energy stress. However, we found that upon longer periods of hypoxia, transcripts were  
285 stabilized to a greater extent than what we observed 18 hours after sealing the vials. This  
286 suggests that mRNA stabilization progressively increases, and may be the product of multiple  
287 mechanisms. As this work focused on the initial transition into hypoxia-induced growth arrest,

288 we cannot discount the possibility that downregulation of the RNA degradation machinery is  
289 important for further mRNA stabilization in later hypoxia stages.

290 Interestingly, we found greater mRNA stabilization in hypoxic cultures treated with CAM. This  
291 may result from stalled ribosomes (59, 61) masking RNase cleavage sites. Furthermore, the burst  
292 of transcription upon re-aeration is blocked by the presence of CAM, causing up to a four-fold  
293 decrease in transcript abundance in the CAM treated cultures when compared to the vehicle  
294 treated cultures. This is consistent with the idea that transcription and translation are physically  
295 coupled, and blocking translation therefore prevents RNA polymerase from efficiently carrying  
296 out transcript elongation, as has been reported for *E. coli* (72-76).

297 Transcript abundance has been found to be inversely correlated with mRNA stability in  
298 exponentially growing bacteria (3, 8, 51, 52, 77), and experimental manipulation of transcription  
299 rates of subsets of genes resulted in altered degradation rates (3, 52). Together, these studies  
300 suggest that high rates of transcription inherently increase degradation rates. We report here that  
301 during oxygen depletion transcript levels are reduced in *M. smegmatis*, which led us to ask if  
302 increased transcript half-lives under stress are a direct result of reduced mRNA levels. However,  
303 our data are inconsistent with this idea; mRNA is rapidly destabilized upon re-aeration even in  
304 the absence of new transcription. We note that one study reported a weak positive correlation  
305 between mRNA abundance and stability in log phase *E. coli* (12), while another reported mRNA  
306 abundance to be positively correlated with stability in carbon-starved *Lactococcus lactis* (8).

307 Taken together, these observations and our own suggest that the relationship between mRNA  
308 stability and abundance is not yet fully understood and may be fundamentally different in  
309 growth-arrested bacteria.

310 The rapid reversibility of hypoxia-induced mRNA stabilization suggests that mRNA decay and  
311 energy metabolic status are closely linked. Consistent with this idea, we have shown that drug-  
312 induced energy stress causes mRNAs to be stabilized, while mRNA decay is increased by a drug  
313 that induces a hyperactive metabolic state. To our knowledge this is the first demonstration that  
314 the rate of bacterial mRNA degradation can be decoupled from growth rate, and suggests that  
315 mRNA decay is controlled by energy status rather than growth rate per se. The mechanism by  
316 which energy status and mRNA decay are coupled remains elusive; the stringent response is not  
317 required, and the stabilization of mRNA during adaptation to hypoxia precedes a decrease in  
318 ATP levels. Possible explanations that should be investigated in future work include ribosome  
319 occupancy, the presence of other RNA-binding proteins, and the subcellular localization of  
320 mRNAs and the RNA degradation machinery.

321

---

## 322 **METHODS**

### 323 **Strain and culture conditions**

324 *Mycobacterium smegmatis* strain mc<sup>2</sup>155 or derivatives (Table 1) were grown in *rich medium*,  
325 Middlebrook 7H9 supplemented with ADC (Albumin Dextrose Catalase, final concentrations 5  
326 g·L<sup>-1</sup> bovine serum albumin fraction V, 2 g·L<sup>-1</sup> dextrose, 0.85 g·L<sup>-1</sup> NaCl, and 3 mg·L<sup>-1</sup> catalase),  
327 0.2% glycerol and 0.05% Tween 80 at 200 rpm and 37°C to an OD<sub>600</sub> of ~0.8, unless specified  
328 otherwise. For the hypoxic cultures, we used a modification of the Wayne model (55). Briefly,  
329 *M. smegmatis* was cultured in 30.5 x 58 mm serum bottles (Wheaton, 223687, 20 mL) using *rich*  
330 *medium* and an initial OD<sub>600</sub>=0.01. The bottles were sealed with a vial crimper (Wheaton,  
331 W225303) using rubber stoppers (Wheaton, W224100-181) and aluminum seals (Wheaton,

332 224193-01). The cultures were grown at 37 °C and 200 rpm to generate hypoxic conditions.

333 Oxygen levels were qualitatively monitored using methylene blue.

334 Carbon starvation cultures were prepared using log phase cells ( $OD_{600}=0.8$ ) grown in *rich*  
335 *medium*. Cultures were rinsed with *carbon starvation medium* (Middlebrook 7H9 supplemented  
336 with  $5 \text{ g}\cdot\text{L}^{-1}$  bovine serum albumin fraction V,  $0.85 \text{ g}\cdot\text{L}^{-1}$  NaCl,  $3 \text{ mg}\cdot\text{L}^{-1}$  catalase and 0.05 %  
337 Tyloxapol) and centrifuged for 5 min at  $3,214 \times g$  at 4°C. After three rinses, the pelleted cells  
338 were resuspended in *carbon starvation medium* to an  $OD_{600}= 0.8$  and incubated at 200 rpm and  
339 37°C.

#### 340 **RNA extraction and determination of mRNA stability**

341 Biological triplicate cultures were treated with rifampicin (RIF) to a final concentration of 150  
342  $\mu\text{g}\cdot\text{mL}^{-1}$  to halt transcription and RNA was extracted at various time points thereafter. For  
343 exponentially growing cells in normoxia and cells in carbon starvation, 7 mL samples ( $OD_{600}$   
344  $\sim 0.8$ ) were collected per replicate and time point after blocking transcription. Samples and were  
345 snap-frozen in liquid nitrogen. For hypoxic samples, degassed RIF was injected using a 30G  
346 needle, and all samples were sacrificially collected per time point and replicate (7 mL,  $OD_{600}$   
347  $\sim 0.8$ ) and snap-frozen in liquid nitrogen within 6 seconds of unsealing the bottles. Time points  
348 were taken at different intervals after adding RIF depending on the experiment.

349 Samples were stored at -80°C and thawed on ice immediately before RNA extraction. Cells were  
350 centrifuged for 5 min at  $3,214 \times g$  at 4°C, and supernatants removed completely. Working on ice,  
351 the pellet was resuspended in 1 mL of TRIzol (Invitrogen), transferred to 2 mL disruption tubes  
352 (OPS Diagnostics 100  $\mu\text{m}$  zirconium lysing matrix, molecular grade) for cell lysis using a  
353 FastPrep-24 5G (MP) with 3 cycles of  $7 \text{ m}\cdot\text{s}^{-1}$  for 30 s, with 2 min on ice after each cycle. 300



354  $\mu\text{L}$  chloroform was added to each sample, mixed and centrifuged for 15 min at  $21,130 \times g$  and 4  
355  $^{\circ}\text{C}$ . RNA was recovered from the aqueous layer and purified after DNase digestion in-column  
356 using the Direct-zol RNA MiniPrep kit according to the manufacturer's instructions. A  
357 NanoDrop 2000c (Thermo) was used to determine RNA concentrations and 1% agarose gels  
358 were used to verify RNA integrity.

359 For cDNA synthesis, 600 ng of total RNA were mixed with  $0.83 \mu\text{L}$  100 mM tris pH 7.5 and  
360  $0.17 \mu\text{L}$   $3 \text{ mg}\cdot\text{mL}^{-1}$  Random Primers (NEB) to a volume of  $5.25 \mu\text{L}$ , denatured at  $70^{\circ}\text{C}$  for 10  
361 min and snap-cooling for 5 min. Reverse transcription was performed for 5 hours at  $42^{\circ}\text{C}$  using  
362 100 U of ProtoScript® II Reverse Transcriptase (NEB), 10 U of RNase Inhibitor (Murine, NEB),  
363  $0.5 \text{ mM}$  each dNTP mix and  $5 \text{ mM}$  DTT in a final volume of  $10 \mu\text{L}$ . RNA was degraded at  $65^{\circ}\text{C}$   
364 for 15 min by addition of  $5 \mu\text{L}$  each  $0.5 \text{ mM}$  EDTA and  $1 \text{ N}$  NaOH, halting the reaction with  
365  $12.5 \mu\text{L}$  of  $1 \text{ M}$  Tris-HCl pH 7.5. cDNA was purified using the MinElute PCR Purification Kit  
366 (Qiagen) according to the manufacturer instructions. mRNA abundance ( $A$ ) over time ( $t$ ) was  
367 determined for different genes (primers are listed in Table 2) by quantitative PCR (qPCR) using  
368 iTaq SYBR Green (Bio-Rad) with  $400 \text{ pg}$  of cDNA and  $0.25 \mu\text{M}$  each primer in  $10 \mu\text{L}$  reactions,  
369 with 40 cycles of 15 s at  $95^{\circ}\text{C}$  followed by 1 min at  $61^{\circ}\text{C}$  (Applied Biosystems™ 7500 Real-  
370 Time PCR). Abundance was expressed as the  $-C_t$  (or the  $\log_2 A(t)$ ). Linear regression was  
371 performed on  $-C_t$  values versus time where the negative reciprocal of the best-fit slope estimates  
372 mRNA half-life. In many cases the decay curves were biphasic, where a rapid period of decay  
373 was followed by a period of slow or undetectable decay. In these cases, only the initial, steeper  
374 slope was used for calculation of half-lives.

375

376 **mRNA stability measured during re-aeration and translational inhibition**

377 Translation was halted in normoxia and hypoxia cultures by chloramphenicol at a final  
378 concentration of 150  $\mu\text{g}\cdot\text{mL}^{-1}$ . 1 min after adding chloramphenicol, rifampicin was added, and  
379 time point samples were collected starting 1 min afterwards.

380 Re-aeration experiments were done using hypoxia cultures 18 hours after the sealing. Briefly,  
381 each bottle was opened and the contents transferred to a 50 mL conical tube. Rifampicin was  
382 added either 1 min before (transcription inhibition during hypoxia) or 2 min after opening the  
383 bottles (transcription inhibition after re-aeration). Samples were taken 2, 7, 12, 17, and 32 min  
384 after opening the bottles and snap-frozen in liquid nitrogen as described before. Samples were  
385 collected in triplicate, steps prior to freezing were performed at 37°C, and incubation of the  
386 samples in either container was done at 200 rpm.

387 **Construction of 6xHis-3xFLAG tagged chromosomal RNase E *M. smegmatis* strain**

388 The RNase E-tagged strain (SS-M\_0296) was built using a two-step process. Plasmid pSS250  
389 was derived from pJM1 (78) and contained 1 kb of the sequence upstream and downstream of  
390 the *rne* (msmeg\_4626) start codon, with the sequence coding for the 6xHis-3xFLAG-TEV-4xGly  
391 linker inserted after the start codon of *rne*. Constructs were built using NEBuilder HiFi DNA  
392 Assembly Master Mix kit (E2621). Integrants were selected based on Hyg<sup>R</sup> (200  $\mu\text{g}\cdot\text{mL}^{-1}$   
393 hygromycin) and confirmed by sequencing. Counter-selection with 15% sucrose was followed  
394 by PCR screening to identify isolates that subsequently underwent second crossovers resulting in  
395 loss of the plasmid and retention of the *rne*-FLAG-tagged sequence.

396

397 **Construction of c-Myc tagged Helicase and PNPase strains**

398 The PNPase-tagged strain (SS-M\_0412) was built by inserting a second copy of *pnp*  
399 (*msmeg\_2656*) with an N-terminal c-Myc-4xGly-linker along with its predicted native promoter  
400 and 5' UTR at the Giles phage integration site (plasmid pSS282) into strain SS-M\_0296. The  
401 RNA helicase-tagged strain (SS-M\_0416) was constructed in a similar way but using a C-  
402 terminal 4xGly-linker-c-Myc tag on *msmeg\_1930* (plasmid pSS285).

403 **Alteration of intracellular ATP with bedaquiline and isoniazid**

404 Cells were grown as described before to an OD<sub>600</sub> of ~1.0, rinsed two times in *Minimal Media*  
405 *Acetate wash* (final concentrations are 0.5 g·L<sup>-1</sup> L-asparagine, 1 g·L<sup>-1</sup> KH<sub>2</sub>PO<sub>4</sub>, 2.5 g·L<sup>-1</sup>  
406 Na<sub>2</sub>HPO<sub>4</sub>, 0.5 g·L<sup>-1</sup> MgSO<sub>4</sub>·7H<sub>2</sub>O, 0.5 mg·L<sup>-1</sup> CaCl<sub>2</sub>, 0.1 mg·L<sup>-1</sup> ZnSO<sub>4</sub>, 0.1% CH<sub>3</sub>COONa,  
407 0.05% tyloxapol, pH 7.5) using 5 min centrifugation steps at 3,214 x g and 4°C, and finally  
408 resuspended in Minimal Media Acetate with ferric ammonium citrate (MMA, *Minimal Media*  
409 *Acetate wash* + 50 mg·L<sup>-1</sup> ferric ammonium citrate) at an OD<sub>600</sub>=0.07. The cells were then grown  
410 for 24 hours at 37°C and 200 rpm to an OD<sub>600</sub> of ~0.8. To remove the high amounts of  
411 extracellular ATP, 30 minutes before drug treatment the cells were rinsed in pre-warmed  
412 *Minimal Media Acetate wash* as described before, resuspended in pre-warmed MMA, and  
413 returned to the incubator. Either bedaquiline (BDQ), isoniazid (INH) or their vehicles were  
414 added to the cell cultures to a final concentration of 5 µg·mL<sup>-1</sup> or 500 µg·mL<sup>-1</sup>, respectively.  
415 Cultures were incubated as described before, and samples were taken 30 min after adding BDQ,  
416 or 6.5 h after adding INH for half-life-estimation and ATP-determination assays.  
417 For half-life measurements, samples for BDQ were taken 0, 3, 6, 9, 12, 15 and 21 min after  
418 adding RIF. Samples for INH were taken 0, 4, 8 and 12 min after adding RIF. All samples were

419 collected in triplicates. RNA extraction for cultures in MMA was performed as indicated before  
420 with the following modifications: cell disruption was performed using 2 mL tubes prefilled with  
421 Lysing Matrix B (MP) and 3 cycles of  $10 \text{ m}\cdot\text{s}^{-1}$  for 40 s; RNA was recovered from the aqueous  
422 layer by isopropanol precipitation and resuspension in RNase-free  $\text{H}_2\text{O}$ ; samples were treated  
423 with 5U of TURBO™ DNase (Ambion) in presence of 80 U of RNase Inhibitor, Murine (NEB)  
424 for 1 hour at  $37^\circ\text{C}$  and under agitation. RNA was purification with an RNeasy Mini Kit (Qiagen)  
425 according to the manufacturer's specifications.

### 426 **Intracellular ATP estimation**

427 ATP was estimated using the BacTiter-Glo kit (Promega). For BDQ or INH treatments in MMA,  
428 after the treatment periods stated above, 1 mL of culture was pelleted at  $\sim 21^\circ\text{C}$  for 1 min at  
429  $21,130 \times g$ . The supernatant was removed and the cells were resuspended in 1 mL of pre-warmed  
430 MMA containing either BDQ, INH or the vehicle to match the prior treatment condition.  
431 Immediately after, 20  $\mu\text{L}$  samples were transferred to a white 384-well plate (Greiner bio-one)  
432 containing 80  $\mu\text{L}$  of the BacTiter-Glo reagent and mixed for 5 minutes at room temperature.  
433 Luminescence was measured in a VICTOR<sup>3</sup> plate reader (PerkinElmer) (intracellular ATP). We  
434 included controls for the supernatant collected (extracellular ATP), media + drug/vehicle  
435 (background), and freshly made ATP standards for each reading.

436 To estimate the intracellular ATP in normoxia and hypoxia Middlebrook 7H9 cultures, 20  $\mu\text{L}$   
437 samples were collected at  $37^\circ\text{C}$  and immediately combined with the reagent to measure total  
438 ATP (intracellular + extracellular). From the same cultures, 1 mL samples were syringe-filtered  
439 (PES 0.2  $\mu\text{m}$ ) and the filtrate combined with the reagent to measure extracellular ATP.  
440 Luminescence was measured as described above. Intracellular ATP was calculated by

441 subtracting the extracellular ATP values from the total ATP values. Hypoxia samples were  
442 sacrificially harvested per time point/replicate and combined with the reagent in <6 seconds. The  
443 respective controls and ATP standards were also included for each reading. All samples were  
444 measured in biological triplicate, and in at least two independent experiments.

445

---

## 446 **AUTHOR CONTRIBUTIONS**

447 DVB and SSS conceived and design the experiments. DVB and YZ performed the experiments.  
448 LGZ performed part of the experiments in Fig. 3. DVB, TA and SSS analyzed the data. DVB  
449 and SSS wrote the manuscript.

450

---

## 451 **ACKNOWLEDGEMENTS**

452 This work was supported by NSF CAREER award 1652756 to SSS. DVB was partially supported  
453 by the LASPAU Fulbright Foreign Student Program. We thank all members of the Shell lab for  
454 technical assistance and helpful discussions. The thank Dr. Christina Stallings, Dr. Jeremy Rock  
455 and Dr. Sarah Fortune for generously providing strains.

456

---

## 457 **References**

- 458 1. Via LE, Lin PL, Ray SM, Carrillo J, Allen SS, Eum SY, Taylor K, Klein E, Manjunatha U, Gonzales J,  
459 Lee EG, Park SK, Raleigh JA, Cho SN, McMurray DN, Flynn JL, Barry CE, 3rd. 2008. Tuberculous  
460 granulomas are hypoxic in guinea pigs, rabbits, and nonhuman primates. *Infect Immun* 76:2333-  
461 40.
- 462 2. Belton M, Brilha S, Manavaki R, Mauri F, Nijran K, Hong YT, Patel NH, Dembek M, Tezera L,  
463 Green J, Moores R, Aigbirhio F, Al-Nahhas A, Fryer TD, Elkington PT, Friedland JS. 2016. Hypoxia  
464 and tissue destruction in pulmonary TB. *Thorax* 71:1145-1153.
- 465

- 466  
467 3. Rustad TR, Minch KJ, Brabant W, Winkler JK, Reiss DJ, Baliga NS, Sherman DR. 2013. Global  
468 analysis of mRNA stability in *Mycobacterium tuberculosis*. *Nucleic Acids Res* 41:509-17.  
469
- 470 4. Albertson MH, Nyström T, Kjelleberg S. 1990. Functional mRNA half-lives in the marine *Vibrio* sp.  
471 S14 during starvation and recovery. *Microbiology* 136:2195-2199.  
472
- 473 5. Georgellis D, Barlow T, Arvidson S, von Gabain A. 1993. Retarded RNA turnover in *Escherichia*  
474 *coli*: a means of maintaining gene expression during anaerobiosis. *Mol Microbiol* 9:375-81.  
475
- 476 6. Sakamoto T, Bryant DA. 1997. Temperature-regulated mRNA accumulation and stabilization for  
477 fatty acid desaturase genes in the cyanobacterium *Synechococcus* sp. strain PCC 7002. *Mol*  
478 *Microbiol* 23:1281-92.  
479
- 480 7. Thorne SH, Williams HD. 1997. Adaptation to nutrient starvation in *Rhizobium leguminosarum*  
481 *bv. phaseoli*: analysis of survival, stress resistance, and changes in macromolecular synthesis  
482 during entry to and exit from stationary phase. *J Bacteriol* 179:6894-901.  
483
- 484 8. Redon E, Loubiere P, Coccagn-Bousquet M. 2005. Role of mRNA stability during genome-wide  
485 adaptation of *Lactococcus lactis* to carbon starvation. *J Biol Chem* 280:36380-5.  
486
- 487 9. Anderson KL, Roberts C, Disz T, Vonstein V, Hwang K, Overbeek R, Olson PD, Projan SJ, Dunman  
488 PM. 2006. Characterization of the *Staphylococcus aureus* heat shock, cold shock, stringent, and  
489 SOS responses and their effects on log-phase mRNA turnover. *J Bacteriol* 188:6739-56.  
490
- 491 10. Dressaire C, Picard F, Redon E, Loubiere P, Queinnec I, Girbal L, Coccagn-Bousquet M. 2013. Role  
492 of mRNA stability during bacterial adaptation. *PLoS One* 8:e59059.  
493
- 494 11. Esquerre T, Laguerre S, Turlan C, Carpousis AJ, Girbal L, Coccagn-Bousquet M. 2014. Dual role of  
495 transcription and transcript stability in the regulation of gene expression in *Escherichia coli* cells  
496 cultured on glucose at different growth rates. *Nucleic Acids Res* 42:2460-72.  
497
- 498 12. Chen H, Shiroguchi K, Ge H, Xie XS. 2015. Genome-wide study of mRNA degradation and  
499 transcript elongation in *Escherichia coli*. *Mol Syst Biol* 11:781.  
500
- 501 13. Ignatov DV, Salina EG, Fursov MV, Skvortsov TA, Azhikina TL, Kaprelyants AS. 2015. Dormant  
502 non-culturable *Mycobacterium tuberculosis* retains stable low-abundant mRNA. *BMC Genomics*  
503 16:954.  
504
- 505 14. Tomcsanyi T, Apirion D. 1985. Processing enzyme ribonuclease E specifically cleaves RNA I. An  
506 inhibitor of primer formation in plasmid DNA synthesis. *J Mol Biol* 185:713-20.  
507
- 508 15. Bouvet P, Belasco JG. 1992. Control of RNase E-mediated RNA degradation by 5'-terminal base  
509 pairing in *E. coli*. *Nature* 360:488-91.  
510
- 511 16. McDowall KJ, Lin-Chao S, Cohen SN. 1994. A+U content rather than a particular nucleotide order  
512 determines the specificity of RNase E cleavage. *J Biol Chem* 269:10790-6.  
513

- 514 17. Apirion D, Gitelman DR. 1980. Decay of RNA in RNA processing mutants of *Escherichia coli*. *Mol*  
515 *Gen Genet* 177:339-43.  
516
- 517 18. Donovan WP, Kushner SR. 1986. Polynucleotide phosphorylase and ribonuclease II are required  
518 for cell viability and mRNA turnover in *Escherichia coli* K-12. *Proc Natl Acad Sci U S A* 83:120-4.  
519
- 520 19. Py B, Causton H, Mudd EA, Higgins CF. 1994. A protein complex mediating mRNA degradation in  
521 *Escherichia coli*. *Mol Microbiol* 14:717-29.  
522
- 523 20. Miczak A, Kaberdin VR, Wei CL, Lin-Chao S. 1996. Proteins associated with RNase E in a  
524 multicomponent ribonucleolytic complex. *Proc Natl Acad Sci U S A* 93:3865-9.  
525
- 526 21. Py B, Higgins CF, Krisch HM, Carpousis AJ. 1996. A DEAD-box RNA helicase in the *Escherichia coli*  
527 RNA degradosome. *Nature* 381:169-72.  
528
- 529 22. Grunberg-Manago M. 1999. Messenger RNA stability and its role in control of gene expression in  
530 bacteria and phages. *Annu Rev Genet* 33:193-227.  
531
- 532 23. Carpousis AJ, Van Houwe G, Ehretsmann C, Krisch HM. 1994. Copurification of *E. coli* RNAase E  
533 and PNPase: evidence for a specific association between two enzymes important in RNA  
534 processing and degradation. *Cell* 76:889-900.  
535
- 536 24. Vanzo NF, Li YS, Py B, Blum E, Higgins CF, Raynal LC, Krisch HM, Carpousis AJ. 1998. Ribonuclease  
537 E organizes the protein interactions in the *Escherichia coli* RNA degradosome. *Genes Dev*  
538 12:2770-81.  
539
- 540 25. Ait-Bara S, Carpousis AJ. 2010. Characterization of the RNA degradosome of *Pseudoalteromonas*  
541 *haloplanktis*: conservation of the RNase E-RhlB interaction in the gammaproteobacteria. *J*  
542 *Bacteriol* 192:5413-23.  
543
- 544 26. Commichau FM, Rothe FM, Herzberg C, Wagner E, Hellwig D, Lehnik-Habrink M, Hammer E,  
545 Volker U, Stulke J. 2009. Novel activities of glycolytic enzymes in *Bacillus subtilis*: interactions  
546 with essential proteins involved in mRNA processing. *Mol Cell Proteomics* 8:1350-60.  
547
- 548 27. Roux CM, DeMuth JP, Dunman PM. 2011. Characterization of components of the *Staphylococcus*  
549 *aureus* mRNA degradosome holoenzyme-like complex. *J Bacteriol* 193:5520-6.  
550
- 551 28. Redko Y, Aubert S, Stachowicz A, Lenormand P, Namane A, Darfeuille F, Thibonnier M, De Reuse  
552 H. 2013. A minimal bacterial RNase J-based degradosome is associated with translating  
553 ribosomes. *Nucleic Acids Res* 41:288-301.  
554
- 555 29. Kovacs L, Csanadi A, Megyeri K, Kaberdin VR, Miczak A. 2005. Mycobacterial RNase E-associated  
556 proteins. *Microbiol Immunol* 49:1003-7.  
557
- 558 30. Csanadi A, Faludi I, Miczak A. 2009. MSMEG\_4626 ribonuclease from *Mycobacterium*  
559 *smegmatis*. *Mol Biol Rep* 36:2341-4.  
560

- 561 31. Tamura M, Moore CJ, Cohen SN. 2013. Nutrient dependence of RNase E essentiality in  
562 Escherichia coli. *J Bacteriol* 195:1133-41.  
563
- 564 32. Prud'homme-Genereux A, Beran RK, Iost I, Ramey CS, Mackie GA, Simons RW. 2004. Physical  
565 and functional interactions among RNase E, polynucleotide phosphorylase and the cold-shock  
566 protein, CsdA: evidence for a 'cold shock degradosome'. *Mol Microbiol* 54:1409-21.  
567
- 568 33. Regonesi ME, Del Favero M, Basilico F, Briani F, Benazzi L, Tortora P, Mauri P, Deho G. 2006.  
569 Analysis of the Escherichia coli RNA degradosome composition by a proteomic approach.  
570 *Biochimie* 88:151-61.  
571
- 572 34. Chen C, Deutscher MP. 2005. Elevation of RNase R in response to multiple stress conditions. *J*  
573 *Biol Chem* 280:34393-6.  
574
- 575 35. Chen C, Deutscher MP. 2010. RNase R is a highly unstable protein regulated by growth phase  
576 and stress. *RNA* 16:667-72.  
577
- 578 36. Kim KS, Manasherob R, Cohen SN. 2008. YmdB: a stress-responsive ribonuclease-binding  
579 regulator of E. coli RNase III activity. *Genes Dev* 22:3497-508.  
580
- 581 37. Schubert OT, Ludwig C, Kogadeeva M, Zimmermann M, Rosenberger G, Gengenbacher M, Gillet  
582 LC, Collins BC, Rost HL, Kaufmann SH, Sauer U, Aebersold R. 2015. Absolute Proteome  
583 Composition and Dynamics during Dormancy and Resuscitation of Mycobacterium tuberculosis.  
584 *Cell Host Microbe* 18:96-108.  
585
- 586 38. Gao J, Lee K, Zhao M, Qiu J, Zhan X, Saxena A, Moore CJ, Cohen SN, Georgiou G. 2006.  
587 Differential modulation of E. coli mRNA abundance by inhibitory proteins that alter the  
588 composition of the degradosome. *Mol Microbiol* 61:394-406.  
589
- 590 39. Iost I, Guillerez J, Dreyfus M. 1992. Bacteriophage T7 RNA polymerase travels far ahead of  
591 ribosomes in vivo. *J Bacteriol* 174:619-22.  
592
- 593 40. Gatewood ML, Jones GH. 2010. (p)ppGpp inhibits polynucleotide phosphorylase from  
594 streptomyces but not from Escherichia coli and increases the stability of bulk mRNA in  
595 Streptomyces coelicolor. *J Bacteriol* 192:4275-80.  
596
- 597 41. Siculella L, Damiano F, di Summa R, Tredici SM, Alduina R, Gnoni GV, Alifano P. 2010. Guanosine  
598 5'-diphosphate 3'-diphosphate (ppGpp) as a negative modulator of polynucleotide  
599 phosphorylase activity in a 'rare' actinomycete. *Mol Microbiol* 77:716-29.  
600
- 601 42. Battesti A, Bouveret E. 2006. Acyl carrier protein/SpoT interaction, the switch linking SpoT-  
602 dependent stress response to fatty acid metabolism. *Mol Microbiol* 62:1048-63.  
603
- 604 43. Frederix M, Downie AJ. 2011. Quorum sensing: regulating the regulators. *Adv Microb Physiol*  
605 58:23-80.  
606



- 607 44. Atkinson GC, Tenson T, Hauryliuk V. 2011. The RelA/SpoT homolog (RSH) superfamily:  
608 distribution and functional evolution of ppGpp synthetases and hydrolases across the tree of  
609 life. *PLoS One* 6:e23479.  
610
- 611 45. Corrigan RM, Bellows LE, Wood A, Grundling A. 2016. ppGpp negatively impacts ribosome  
612 assembly affecting growth and antimicrobial tolerance in Gram-positive bacteria. *Proc Natl Acad  
613 Sci U S A* 113:E1710-9.  
614
- 615 46. Gentry DR, Hernandez VJ, Nguyen LH, Jensen DB, Cashel M. 1993. Synthesis of the stationary-  
616 phase sigma factor sigma s is positively regulated by ppGpp. *J Bacteriol* 175:7982-9.  
617
- 618 47. Chakraborty R, Bibb M. 1997. The ppGpp synthetase gene (*relA*) of *Streptomyces coelicolor*  
619 A3(2) plays a conditional role in antibiotic production and morphological differentiation. *J  
620 Bacteriol* 179:5854-61.  
621
- 622 48. Martinez-Costa OH, Fernandez-Moreno MA, Malpartida F. 1998. The *relA/spoT*-homologous  
623 gene in *Streptomyces coelicolor* encodes both ribosome-dependent (p)ppGpp-synthesizing and -  
624 degrading activities. *J Bacteriol* 180:4123-32.  
625
- 626 49. Artsimovitch I, Patlan V, Sekine S, Vassylyeva MN, Hosaka T, Ochi K, Yokoyama S, Vassylyev DG.  
627 2004. Structural basis for transcription regulation by alarmone ppGpp. *Cell* 117:299-310.  
628
- 629 50. Avarbock D, Avarbock A, Rubin H. 2000. Differential regulation of opposing RelMtb activities by  
630 the aminoacylation state of a tRNA.ribosome.mRNA.RelMtb complex. *Biochemistry* 39:11640-8.  
631
- 632 51. Bernstein JA, Khodursky AB, Lin PH, Lin-Chao S, Cohen SN. 2002. Global analysis of mRNA decay  
633 and abundance in *Escherichia coli* at single-gene resolution using two-color fluorescent DNA  
634 microarrays. *Proc Natl Acad Sci U S A* 99:9697-702.  
635
- 636 52. Nouaille S, Mondeil S, Finoux AL, Moulis C, Girbal L, Coccagn-Bousquet M. 2017. The stability of  
637 an mRNA is influenced by its concentration: a potential physical mechanism to regulate gene  
638 expression. *Nucleic Acids Res* 45:11711-11724.  
639
- 640 53. Russell JH, Keiler KC. 2009. Subcellular localization of a bacterial regulatory RNA. *Proc Natl Acad  
641 Sci U S A* 106:16405-9.  
642
- 643 54. Bayas CA, Wang J, Lee MK, Schrader JM, Shapiro L, Moerner WE. 2018. Spatial organization and  
644 dynamics of RNase E and ribosomes in *Caulobacter crescentus*. *Proc Natl Acad Sci U S A*  
645 115:E3712-E3721.  
646
- 647 55. Wayne LG, Hayes LG. 1996. An in vitro model for sequential study of shutdown of  
648 *Mycobacterium tuberculosis* through two stages of nonreplicating persistence. *Infect Immun*  
649 64:2062-9.  
650
- 651 56. Weiss LA, Stallings CL. 2013. Essential roles for *Mycobacterium tuberculosis* Rel beyond the  
652 production of (p)ppGpp. *J Bacteriol* 195:5629-38.  
653

- 654 57. Dahl JL, Arora K, Boshoff HI, Whiteford DC, Pacheco SA, Walsh OJ, Lau-Bonilla D, Davis WB,  
655 Garza AG. 2005. The *relA* homolog of *Mycobacterium smegmatis* affects cell appearance,  
656 viability, and gene expression. *J Bacteriol* 187:2439-47.  
657
- 658 58. Rock JM, Hopkins FF, Chavez A, Diallo M, Chase MR, Gerrick ER, Pritchard JR, Church GM, Rubin  
659 EJ, Sasseti CM, Schnappinger D, Fortune SM. 2017. Programmable transcriptional repression in  
660 mycobacteria using an orthogonal CRISPR interference platform. *Nat Microbiol* 2:16274.  
661
- 662 59. Wolfe AD, Hahn FE. 1965. Mode of Action of Chloramphenicol. Ix. Effects of Chloramphenicol  
663 Upon a Ribosomal Amino Acid Polymerization System and Its Binding to Bacterial Ribosome.  
664 *Biochim Biophys Acta* 95:146-55.  
665
- 666 60. Yukioka M, Morisawa S. 1971. Enhancement of the phenylalanyl-oligonucleotide binding to the  
667 peptidyl recognition center of ribosomal peptidyltransferase and inhibition of the  
668 chloramphenicol binding to ribosomes. *Biochim Biophys Acta* 254:304-15.  
669
- 670 61. Drainas D, Kalpaxis DL, Coutsogeorgopoulos C. 1987. Inhibition of ribosomal peptidyltransferase  
671 by chloramphenicol. Kinetic studies. *Eur J Biochem* 164:53-8.  
672
- 673 62. Lopez PJ, Marchand I, Yarchuk O, Dreyfus M. 1998. Translation inhibitors stabilize *Escherichia*  
674 *coli* mRNAs independently of ribosome protection. *Proc Natl Acad Sci U S A* 95:6067-72.  
675
- 676 63. Chan LY, Mugler CF, Heinrich S, Vallotton P, Weis K. 2018. Non-invasive measurement of mRNA  
677 decay reveals translation initiation as the major determinant of mRNA stability. *Elife* 7.  
678
- 679 64. Lakshmanan M, Xavier AS. 2013. Bedaquiline - The first ATP synthase inhibitor against multi drug  
680 resistant tuberculosis. *J Young Pharm* 5:112-5.  
681
- 682 65. Shetty A, Dick T. 2018. Mycobacterial Cell Wall Synthesis Inhibitors Cause Lethal ATP Burst. *Front*  
683 *Microbiol* 9:1898.  
684
- 685 66. Rao SP, Alonso S, Rand L, Dick T, Pethe K. 2008. The protonmotive force is required for  
686 maintaining ATP homeostasis and viability of hypoxic, nonreplicating *Mycobacterium*  
687 *tuberculosis*. *Proc Natl Acad Sci U S A* 105:11945-50.  
688
- 689 67. Eoh H, Rhee KY. 2013. Multifunctional essentiality of succinate metabolism in adaptation to  
690 hypoxia in *Mycobacterium tuberculosis*. *Proc Natl Acad Sci U S A* 110:6554-9.  
691
- 692 68. Smith T, Wolff KA, Nguyen L. 2013. Molecular biology of drug resistance in *Mycobacterium*  
693 *tuberculosis*. *Curr Top Microbiol Immunol* 374:53-80.  
694
- 695 69. Kim JH, O'Brien KM, Sharma R, Boshoff HI, Rehren G, Chakraborty S, Wallach JB, Monteleone M,  
696 Wilson DJ, Aldrich CC, Barry CE, 3rd, Rhee KY, Ehrt S, Schnappinger D. 2013. A genetic strategy to  
697 identify targets for the development of drugs that prevent bacterial persistence. *Proc Natl Acad*  
698 *Sci U S A* 110:19095-100.  
699

- 700 70. Deb C, Lee CM, Dubey VS, Daniel J, Abomoelak B, Sirakova TD, Pawar S, Rogers L, Kolattukudy  
701 PE. 2009. A novel in vitro multiple-stress dormancy model for *Mycobacterium tuberculosis*  
702 generates a lipid-loaded, drug-tolerant, dormant pathogen. *PLoS One* 4:e6077.  
703
- 704 71. Martini MC, Zhou Y, Sun H, Shell SS. 2019. Defining the transcriptional and post-transcriptional  
705 landscapes of *Mycobacterium smegmatis* in aerobic growth and hypoxia. *Frontiers in*  
706 *Microbiology* 10:591.  
707
- 708 72. Fan H, Conn AB, Williams PB, Diggs S, Hahm J, Gamper HB, Jr., Hou YM, O'Leary SE, Wang Y,  
709 Blaha GM. 2017. Transcription-translation coupling: direct interactions of RNA polymerase with  
710 ribosomes and ribosomal subunits. *Nucleic Acids Res* 45:11043-11055.  
711
- 712 73. Zhang Y, Mooney RA, Grass JA, Sivaramakrishnan P, Herman C, Landick R, Wang JD. 2014. DksA  
713 guards elongating RNA polymerase against ribosome-stalling-induced arrest. *Mol Cell* 53:766-78.  
714
- 715 74. Miller OL, Jr., Hamkalo BA, Thomas CA, Jr. 1970. Visualization of bacterial genes in action.  
716 *Science* 169:392-5.  
717
- 718 75. Burmann BM, Schweimer K, Luo X, Wahl MC, Stitt BL, Gottesman ME, Rosch P. 2010. A  
719 NusE:NusG complex links transcription and translation. *Science* 328:501-4.  
720
- 721 76. Proshkin S, Rahmouni AR, Mironov A, Nudler E. 2010. Cooperation between translating  
722 ribosomes and RNA polymerase in transcription elongation. *Science* 328:504-8.  
723
- 724 77. Esquerre T, Moisan A, Chiapello H, Arike L, Vilu R, Gaspin C, Cocaign-Bousquet M, Girbal L. 2015.  
725 Genome-wide investigation of mRNA lifetime determinants in *Escherichia coli* cells cultured at  
726 different growth rates. *BMC Genomics* 16:275.  
727
- 728 78. Farrow MF, Rubin EJ. 2008. Function of a mycobacterial major facilitator superfamily pump  
729 requires a membrane-associated lipoprotein. *J Bacteriol* 190:1783-91.  
730
- 731 79. Snapper SB, Melton RE, Mustafa S, Kieser T, Jacobs WR, Jr. 1990. Isolation and characterization  
732 of efficient plasmid transformation mutants of *Mycobacterium smegmatis*. *Mol Microbiol*  
733 4:1911-9.

---

734

735

736 **FIGURES**

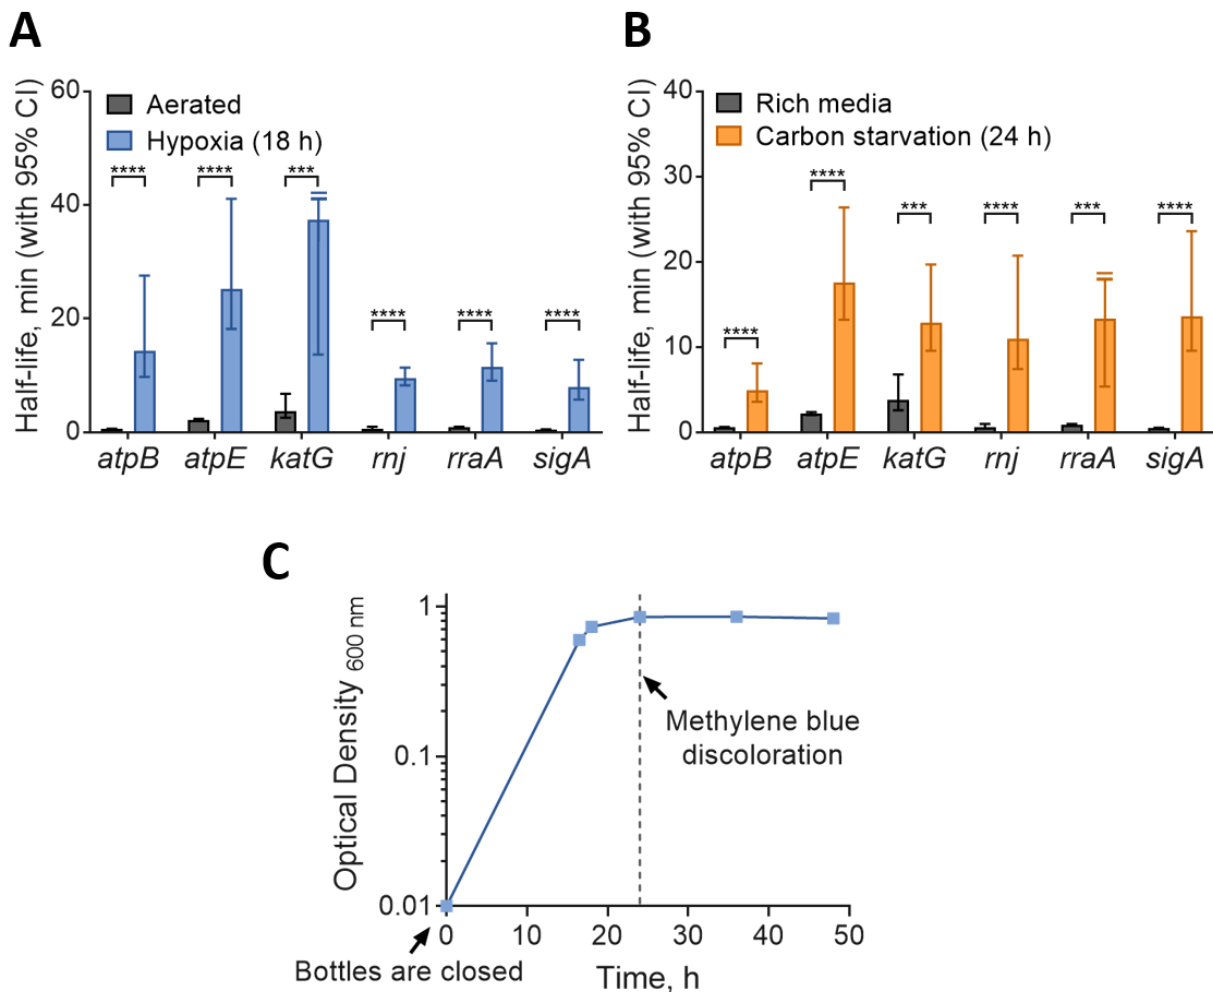

737

738 **Figure 1**

739 **Transcript half-lives are increased in response to hypoxia and carbon starvation stress.**

740 Transcript half-lives for the indicated genes were measured for *M. smegmatis* mc<sup>2</sup>155 after  
741 blocking transcription with 150 µg·mL<sup>-1</sup> RIF. RNA samples were collected (A) during log phase  
742 normoxia, and hypoxia (18 hours after closing the bottles); or (B) during log phase in 7H9  
743 supplemented with ADC, glycerol, and Tween 80 (rich media) or 7H9 with Tyloxapol only  
744 (carbon starvation, 24 hours). Degradation rates were compared using linear regression (*n*=3),  
745 and half-lives were determined by the reciprocal of the best-fit slope. Error bars: 95% CI. \*\*\*  
746 *p*<0.001; \*\*\*\* *p*<0.0001. When a slope of zero was included in the 95% CI (indicating no  
747 degradation), the upper limit for half-life was unbounded, indicated by a clipped error bar with a  
748 double line. (C) Growth kinetics for *M. smegmatis* under hypoxia using a variation of the Wayne  
749 model (55), showing OD stabilization at 18-24 hours. Oxygen depletion was assessed  
750 qualitatively by methylene blue discoloration.

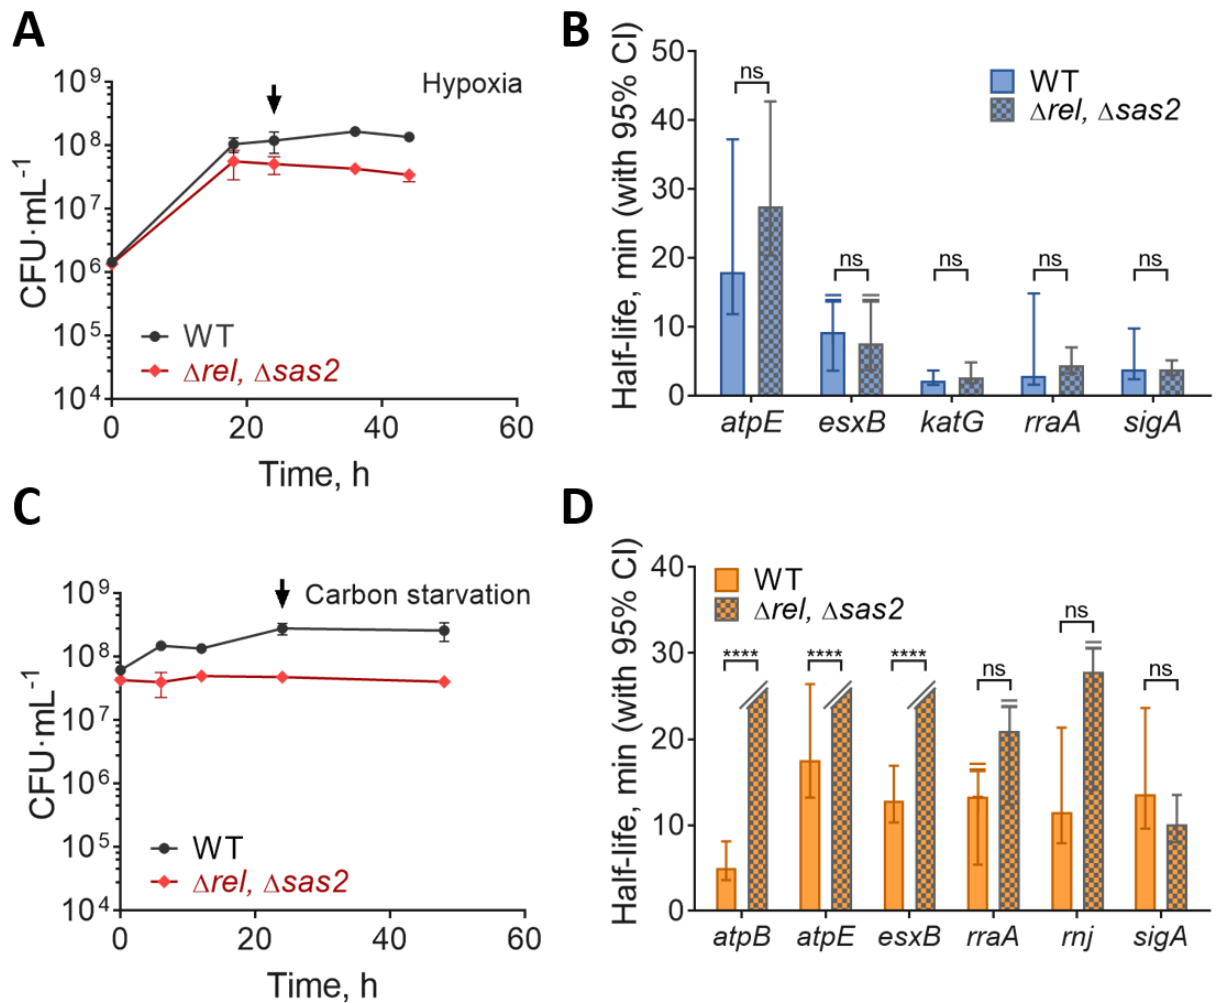

751

752 **Figure 2**

753 **Transcript stabilization in hypoxia and carbon starvation is not dependent on the stringent**

754 **response.** (A) Growth kinetics for *M. smegmatis* mc<sup>2</sup>155 (WT) and  $\Delta rel, \Delta sas2$  strains cultured

755 in 7H9 in flasks sealed at time 0. (B) Transcript half-lives for a set of genes 24 hours after

756 sealing the hypoxia bottles (arrow in A). RNA samples were collected after blocking

757 transcription with 150  $\mu\text{g}\cdot\text{mL}^{-1}$  RIF. (C) Bacteria were grown to log phase in 7H9 supplemented

758 with ADC, glycerol, and Tween 80, then transferred to 7H9 supplemented with Tyloxapol only

759 at time 0. (D) Transcript stability for a set of genes 22 hours after transfer to carbon starvation

760 media (arrow in C). In A and C, the mean and SD of triplicate cultures is shown. In B and D,

761 half-lives were compared using linear regression analysis ( $n=3$ ). Error bars: 95% CI. \*\*\*\*

762  $p<0.0001$ , n.s.  $p>0.05$ . In cases where no degradation was observed or when the upper 95% CI

763 limit was unbounded, the bar or upper error bar were clipped, respectively.

764

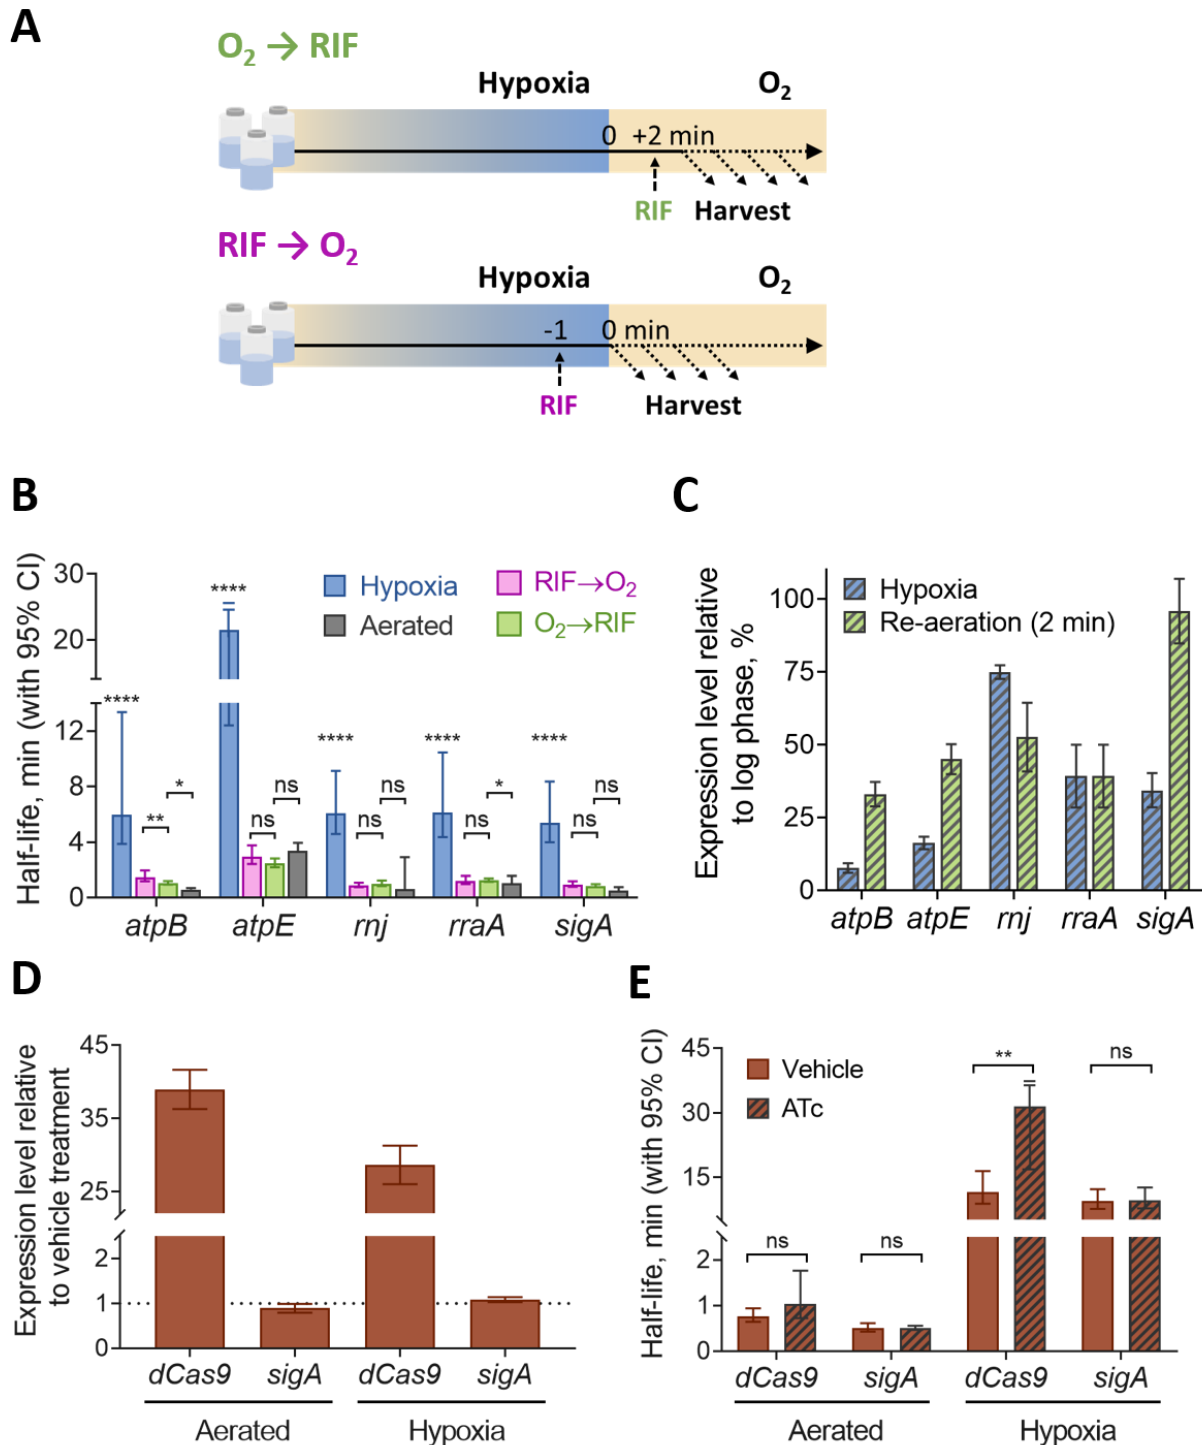

765  
766

**Figure 3**

767 **Hypoxia-induced mRNA stability is reversible and independent of mRNA abundance.** (A)  
768 *M. smegmatis* was sealed in vials for 18 hours to produce a hypoxic environment, then re-  
769 exposed to oxygen for two minutes before transcription was inhibited RIF (top) or injected with  
770 RIF one minute prior to opening the vials and re-exposing to oxygen (bottom). (B) Transcript

771 half-lives for a set of genes are displayed for log phase normoxia cultures, hypoxia (18 h), and  
772 re-aeration with RIF added either before or after opening the vials. Half-lives were compared by  
773 linear regression analysis ( $n=3$ ). (C) Expression levels of transcripts in hypoxia (18 h) or 2 min  
774 re-aeration relative to the expression levels in log phase normoxia cultures (percentage). Error  
775 bars: SD. (D) Expression levels of transcripts in hypoxia (18 h) or log phase normoxia after  
776 being treated with  $200 \text{ ng}\cdot\text{mL}^{-1}$  ATc for 1 h or 10 min, respectively, to induce *dCas9*  
777 overexpression, relative to the expression levels in a  $\text{H}_2\text{O}$  vehicle treatment (percentage). Error  
778 bars: SD. (E) Transcript half-lives for *dCas9* and *sigA* for log phase normoxia and hypoxia (18 h)  
779 after induction of *dCas9* with ATc or vehicle treatment as shown in D. In B and E, degradation  
780 rates were compared using linear regression ( $n=3$ ), and half-lives were determined by the  
781 reciprocal of the best-fit slope. Error bars: 95% CI. \*  $p<0.05$ , \*\*  $p<0.01$ , \*\*\*\*  $p<0.0001$ , n.s.  
782  $p>0.05$ .

783

784

**A**

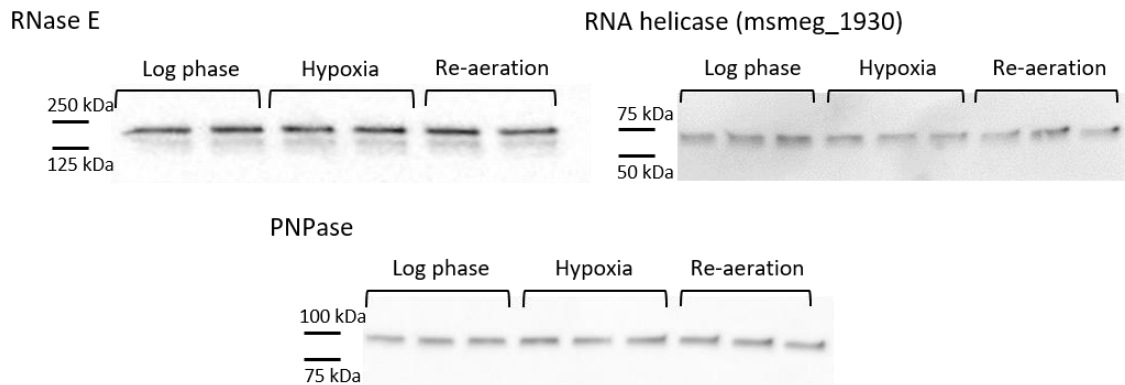

**B**

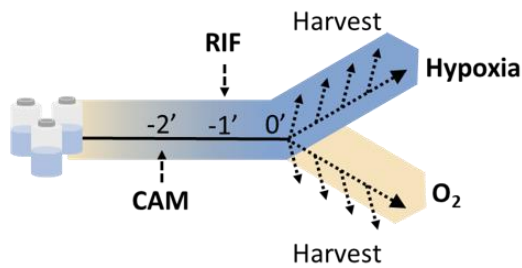

**C**

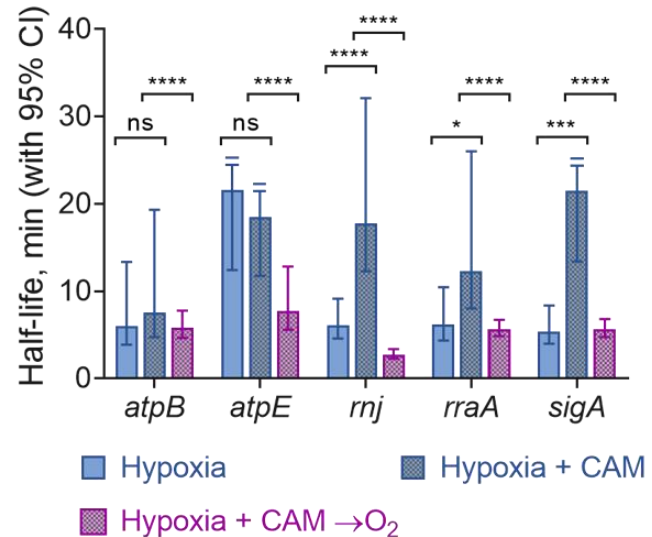

785

786 **Figure 4**

787 **mRNA stability is regulated independently of degradation protein levels.** (A) Western  
 788 blotting for FLAG-tagged RNase E, and c-Myc-tagged PNPase or RNA helicase (msmeg\_1930)  
 789 in *M. smegmatis* in log phase normoxia, hypoxia (18 h), and 2 min re-aeration. Samples were  
 790 normalized to total protein level, which were similar on a per-OD basis in all conditions. (B)  
 791 Translation was inhibited in hypoxic cultures by 150 μg·mL<sup>-1</sup> CAM 1 min before adding 150  
 792 μg·mL<sup>-1</sup> RIF. RNA was harvested at time points beginning 2 min after adding CAM. (C)  
 793 Transcript half-lives for samples from hypoxic cultures with the drug vehicle (ethanol), hypoxic  
 794 cultures after translation inhibition, and 2 min re-aeration after translation inhibition.  
 795 Degradation rates were compared using linear regression (*n*=3), and half-lives were determined  
 796 by the reciprocal of the best-fit slope. Error bars: 95% CI. n.s., *p*>0.05, \* *p*<0.05, \*\*\* *p*<0.001,  
 797 \*\*\*\* *p*<0.0001.



798

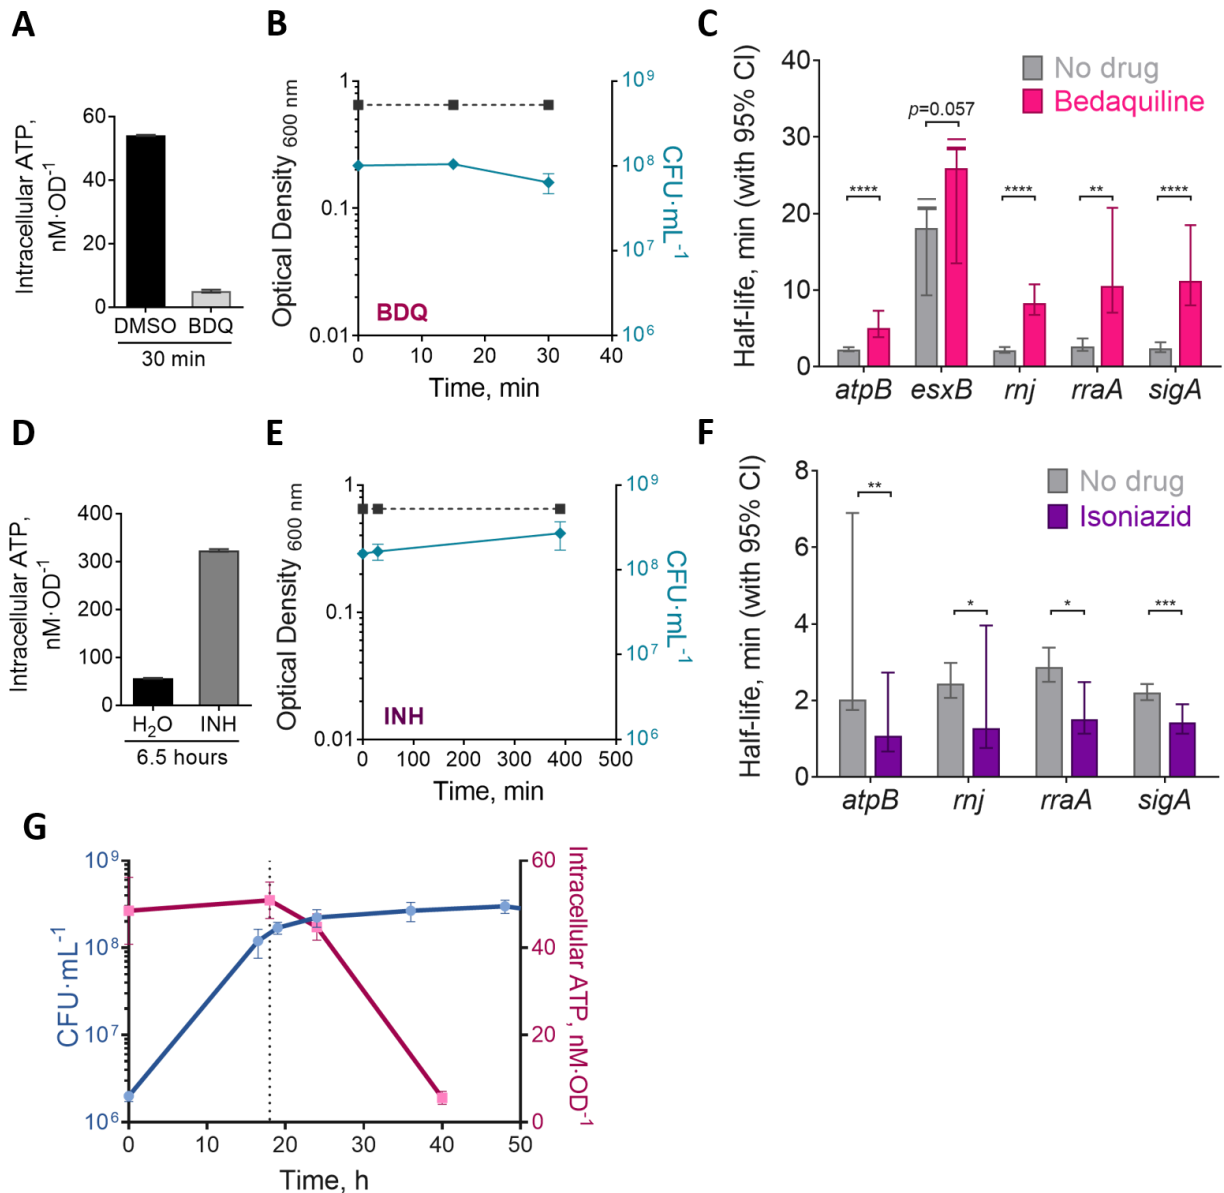

799

800 **FIG 5**

801 **mRNA stability is modulated in response to changes in metabolic status.** (A) *M. smegmatis*  
 802 was cultured in MMA media for 22 hours to OD<sub>600</sub> 0.8 before being treated with 5 μg·mL<sup>-1</sup> BDQ  
 803 or the vehicle (DMSO) for 30 min. Intracellular ATP was determined using the BacTiter-Glo kit.  
 804 (B) Growth kinetics for *M. smegmatis* from panel A in presence of BDQ. (C) Transcript half-  
 805 lives for a sub-set of transcripts collected during intracellular ATP depletion (30 min with BDQ)  
 806 or at the basal levels (30 min with DMSO). (D) As in panel A, but for *M. smegmatis* treated with  
 807 500 μg·mL<sup>-1</sup> INH or the vehicle (H<sub>2</sub>O) for 6.5 hours. (E) Growth kinetics for *M. smegmatis* from  
 808 panel D in presence of INH. (F) Transcript half-lives for a sub-set of transcripts after 6.5 h of  
 809 INH or vehicle treatment. (G) Growth kinetics for *M. smegmatis* transitioning into hypoxia, and

810 intracellular ATP levels at different stages. The dotted line represents the time at which transcript  
 811 stability analysis were made for the hypoxia (18 h) condition for Figures 1-4. In C and F, half-  
 812 lives were compared using linear regression analysis ( $n=3$ ). Error bars: 95% CI. \*  $p<0.05$ , \*\*  
 813  $p<0.01$ , \*\*\*  $p<0.001$ , \*\*\*\*  $p<0.0001$ .

814

815 **TABLES**

816 **TABLE 1**

817 Strains used and sources

| Strain              | Characteristics                                                                                                                                                                                                                                                                                 | Reference or source |
|---------------------|-------------------------------------------------------------------------------------------------------------------------------------------------------------------------------------------------------------------------------------------------------------------------------------------------|---------------------|
| mc <sup>2</sup> 155 | <i>M. smegmatis</i> , WT                                                                                                                                                                                                                                                                        | (79)                |
| SS-M_0296           | mc <sup>2</sup> 155 in which the native copy of RNase E ( <i>rne</i> ) is N-terminally tagged with 6xHis-3xFLAG-TEV-4xGly linker<br>(CACCACCACCACCACCACGATTACAAGGATCACGATGGCGATTACAAGGATCATGACATCGACTATAAGGACGATGACGATAAGGAGAACCTGTACTTCCAGGGCGGCGGCGGC).                                       | This work           |
| SS-M_0412           | SS-M_0296 derivative containing a second copy of PNPase ( <i>msmeg_2656</i> ) with its predicted native promoter and 5' UTR, and N-terminally tagged with c-Myc-4xGly-linker<br>(GAGCAGAAGCTGATCTCGGAAGAGGACCTCGGCGGCGGCGGC) contained on Giles-integrating plasmid pSS282 (Hyg <sup>R</sup> ). | This work           |
| SS-M_0416           | SS-M_0296 derivative containing a second copy of RNA helicase ( <i>msmeg_1930</i> ) with its predicted native promoter and 5' UTR, and C-terminally tagged with 4x Gly linker-c-Myc<br>(GGCGGCGGCGGCGGAGCAGAAGCTGATCTCGGA) contained on a Giles-integrating plasmid pSS285 (Hyg <sup>R</sup> ). | This work           |
| $\Delta rel_{Msm}$  | mc <sup>2</sup> 155 derivative, $\Delta rel \Delta sas2$                                                                                                                                                                                                                                        | (56)                |
| SS-M_0203           | mc <sup>2</sup> 155 derivative transformed with plasmid pJR962, containing an ATc regulated <i>dCas9</i> .                                                                                                                                                                                      | (58)                |

818

819

820 **TABLE 2**

821 Primers for qPCR

| <b>Primer name</b> | <b>Gene</b>              | <b>Directionality</b> | <b>Sequence 5' → 3'</b> |
|--------------------|--------------------------|-----------------------|-------------------------|
| SSS903             | <i>atpB</i> (msmeg_4942) | Forward               | TGTTTCGTGTTTCGTCTGCTAC  |
| SSS904             | <i>atpB</i> (msmeg_4942) | Reverse               | CGGCTTGGCGAGTTCTT       |
| SSS909             | <i>atpE</i> (msmeg_4941) | Forward               | GGGTAACGCGCTGATCTC      |
| SSS910             | <i>atpE</i> (msmeg_4941) | Reverse               | GAAGGCCAGGTTGATGAAGTA   |
| SSS1241            | <i>dCas9</i>             | Forward               | GACAAGTCGAAGTTCCTGATGTA |
| SSS1242            | <i>dCas9</i>             | Reverse               | GATCTGCTTGTTCGGGTAGTT   |
| SSS537             | <i>esxB</i> (msmeg_0065) | Forward               | GGTGAGGACACAGGGAAATAAG  |
| SSS538             | <i>esxB</i> (msmeg_0065) | Reverse               | CGGAGATGCGCTCGAAAT      |
| SSS856             | <i>katG</i> (msmeg_6384) | Forward               | GGCCAATCAGCTCAATCT      |
| SSS857             | <i>katG</i> (msmeg_6384) | Reverse               | CGGACCGGTAGTCGAAATC     |
| SSS706             | <i>rnj</i> (msmeg_2685)  | Forward               | TCATCCTCTCATCGGGTTTC    |
| SSS707             | <i>rnj</i> (msmeg_2685)  | Reverse               | TTCGCGCTCAACCTTCT       |
| SSS697             | <i>rraA</i> (msmeg_6439) | Forward               | AACTACGGCGGCAAGAT       |
| SSS698             | <i>rraA</i> (msmeg_6439) | Reverse               | GTCGAGAGGATCGACTTCAG    |
| JR273 (58)         | <i>sigA</i> (msmeg_2758) | Forward               | GACTACACCAAGGGCTACAAG   |
| JR274 (58)         | <i>sigA</i> (msmeg_2758) | Reverse               | TTGATCACCTCGACCATGTG    |

822
